# Supplementary material for: Detection of difference in acidity between arrayed carboxy groups and the groups dissolved in solution by reductive desorption of a self-assembled monolayer of carboxy-terminated thiols
Source: Royal Society of Chemistry journal article supplement (doi:10.1039/b102601c), 2001-01-01
Supplement: b102601c.doc [file b102601c.doc]

Detection of difference in acidity between arrayed carboxy groups and the groups dissolved in solution by reductive desorption of a self-assembled monolayer of carboxy-terminated thiols

Hirokazu Munakata and Susumu Kuwabata*

Department of Materials Chemistry, Graduate School of Engineering, Osaka University,

2-1 Yamada-oka, Suita, Osaka 565-0871, Japan. E-mail: kuwabata@chem.eng.osaka-u.ac.jp

**Fig. S1** Titration curves obtained from linear sweep voltammograms of MPA/Au(111) electrodes taken at 10 (a), 50 (b), and 200 (c) mV s-1.
